# Supplementary material
Source: MDPI journal article supplement (https://www.mdpi.com/2075-163X/9/11/700)
Supplement: s1 [file s1]

# Nataliakulikite, $\text{Ca}_4\text{Ti}_2(\text{Fe}^{3+}, \text{Fe}^{2+})(\text{Si}, \text{Fe}^{3+}, \text{Al})\text{O}_{11}$ , a New Perovskite-Supergroup Mineral from Hatrurim Basin, Negev Desert, Israel

Victor V. Sharygin <sup>1,2,3,\*</sup>, Grigory A. Yakovlev <sup>3</sup>, Richard Wirth <sup>4</sup>, Yurii V. Seryotkin <sup>1,2</sup>,  
Ellina V. Sokol <sup>1</sup>, Elena N. Nigmatulina <sup>1</sup>, Nikolai S. Karmanov <sup>1</sup> and Leonid A. Pautov <sup>5,6</sup>

<sup>1</sup> V.S. Sobolev Institute of Geology and Mineralogy, Siberian Branch of the RAS, 3 Acad. Koptiyuga pr., Novosibirsk 630090, Russia

<sup>2</sup> Department of Geology and Geophysics, Novosibirsk State University, 2 Pirogov str., Novosibirsk 630090, Russia

<sup>3</sup> ExtraTerra Consortium, Institute of Physics and Technology, Ural Federal University, 19 Mira str., Ekaterinburg 620002, Russia

<sup>4</sup> Helmholtz Centre Potsdam, GFZ German Research Centre for Geosciences, Section 3.3, Telegrafenberg, 14473 Potsdam, Germany

<sup>5</sup> A.E. Fersman Mineralogical Museum RAS, 18/2 Leninskiy pr., 115162 Moscow, Russia

<sup>6</sup> Institute of Mineralogy, Uralian Branch of the RAS, Miass 456317, Russia

\* Correspondence: sharygin@igm.nsc.ru; Tel.: +7-383-330-80-84

Received: 18 October 2019; Accepted: 8 November 2019; Published: 13 November 2019

**Table S1.** Chemical composition (WDS, wt.%) of nataliakulikite from larnite-gehlenite rock (W11-3), Nahal Morag Canyon, Hatrurim Basin, Israel.

| Area                           | S-1   | S-1   | S-4   | S-4   | S-4   | S-4   | S-5   | S-5   | S-5   | S-6   | S-6   | S-8a  | S-8a  | S-8b  | S-8b  | S-9a  | S-10  | S-10  |
|--------------------------------|-------|-------|-------|-------|-------|-------|-------|-------|-------|-------|-------|-------|-------|-------|-------|-------|-------|-------|
| SiO <sub>2</sub>               | 4.59  | 5.26  | 4.32  | 5.71  | 4.93  | 5.40  | 5.47  | 5.49  | 6.87  | 4.91  | 5.66  | 4.32  | 4.00  | 5.15  | 4.03  | 4.93  | 5.40  | 4.53  |
| TiO <sub>2</sub>               | 30.53 | 28.54 | 30.66 | 26.91 | 26.63 | 25.83 | 26.01 | 27.77 | 25.48 | 29.06 | 27.65 | 29.68 | 30.77 | 29.94 | 31.34 | 27.90 | 27.95 | 29.02 |
| ZrO <sub>2</sub>               | 0.64  | 0.61  | 0.64  | 0.63  | 0.71  | 0.64  | 0.64  | 0.59  | 0.58  | 0.61  | 0.67  | 0.65  | 0.74  | 0.56  | 0.71  | 0.70  | 0.73  | 0.73  |
| Nb <sub>2</sub> O <sub>5</sub> | 0.04  | 0.02  | 0.07  | 0.01  | 0.03  | 0.04  | 0.02  | 0.08  | 0.02  | 0.06  | 0.00  | 0.04  | 0.05  | 0.10  | 0.06  | 0.00  | 0.06  | 0.02  |
| Cr <sub>2</sub> O <sub>3</sub> | 0.06  | 0.17  | 0.09  | 0.12  | 0.10  | 0.09  | 0.12  | 0.12  | 0.10  | 0.08  | 0.12  | 0.10  | 0.02  | 0.07  | 0.05  | 0.09  | 0.07  | 0.07  |
| Al <sub>2</sub> O <sub>3</sub> | 1.28  | 1.24  | 1.47  | 1.55  | 2.05  | 2.39  | 2.22  | 1.41  | 1.85  | 1.40  | 2.58  | 1.94  | 2.00  | 1.46  | 1.76  | 1.99  | 1.72  | 2.05  |
| Fe <sub>2</sub> O <sub>3</sub> | 12.87 | 16.23 | 12.76 | 17.53 | 18.99 | 19.62 | 19.51 | 16.34 | 17.36 | 15.12 | 14.85 | 14.36 | 12.74 | 13.02 | 12.09 | 17.00 | 15.75 | 15.32 |
| FeO                            | 6.14  | 5.38  | 6.06  | 3.89  | 3.05  | 2.75  | 3.19  | 4.33  | 4.27  | 5.11  | 4.81  | 5.11  | 5.92  | 6.34  | 6.26  | 4.32  | 5.20  | 5.01  |
| MnO                            | 0.13  | 0.19  | 0.05  | 0.15  | 0.04  | 0.06  | 0.06  | 0.16  | 0.07  | 0.12  | 0.08  | 0.00  | 0.00  | 0.05  | 0.03  | 0.03  | 0.04  | 0.02  |
| CaO                            | 41.90 | 41.89 | 41.87 | 42.29 | 42.18 | 42.37 | 42.27 | 42.34 | 42.25 | 42.09 | 42.19 | 42.04 | 41.91 | 42.09 | 42.06 | 42.08 | 41.86 | 41.92 |
| SrO                            | 0.24  | 0.27  | 0.23  | 0.29  | 0.20  | 0.22  | 0.22  | 0.28  | 0.28  | 0.26  | 0.29  | 0.23  | 0.22  | 0.28  | 0.23  | 0.24  | 0.28  | 0.26  |
| UO <sub>2</sub>                | 0.11  | 0.12  | 0.19  | 0.14  | 0.23  | 0.11  | 0.17  | 0.14  | 0.17  | 0.23  | 0.14  | 0.21  | 0.25  | 0.12  | 0.20  | 0.10  | 0.14  | 0.21  |
| Sum                            | 98.53 | 99.90 | 98.40 | 99.23 | 99.14 | 99.52 | 99.91 | 99.05 | 99.30 | 99.05 | 99.05 | 98.68 | 98.62 | 99.18 | 98.82 | 99.38 | 99.20 | 99.16 |

| <i>Formula based on 8 cations and 11 oxygens</i>                                  |       |       |       |       |       |       |       |       |       |       |       |       |       |       |       |       |       |       |
|-----------------------------------------------------------------------------------|-------|-------|-------|-------|-------|-------|-------|-------|-------|-------|-------|-------|-------|-------|-------|-------|-------|-------|
| Si                                                                                | 0.411 | 0.465 | 0.387 | 0.506 | 0.438 | 0.476 | 0.481 | 0.488 | 0.606 | 0.437 | 0.500 | 0.386 | 0.357 | 0.457 | 0.359 | 0.437 | 0.479 | 0.403 |
| Al                                                                                | 0.135 | 0.129 | 0.155 | 0.162 | 0.215 | 0.249 | 0.231 | 0.148 | 0.192 | 0.147 | 0.269 | 0.204 | 0.210 | 0.152 | 0.185 | 0.208 | 0.180 | 0.215 |
| Fe <sup>3+</sup>                                                                  | 0.454 | 0.406 | 0.458 | 0.332 | 0.347 | 0.275 | 0.288 | 0.364 | 0.202 | 0.416 | 0.231 | 0.410 | 0.432 | 0.391 | 0.456 | 0.356 | 0.341 | 0.382 |
| Sum T                                                                             | 1.000 | 1.000 | 1.000 | 1.000 | 1.000 | 1.000 | 1.000 | 1.000 | 1.000 | 1.000 | 1.000 | 1.000 | 1.000 | 1.000 | 1.000 | 1.000 | 1.000 | 1.000 |
| Ti                                                                                | 2.054 | 1.896 | 2.066 | 1.793 | 1.779 | 1.713 | 1.721 | 1.855 | 1.689 | 1.946 | 1.836 | 1.992 | 2.068 | 1.997 | 2.102 | 1.858 | 1.865 | 1.939 |
| Zr                                                                                | 0.028 | 0.026 | 0.028 | 0.027 | 0.031 | 0.028 | 0.027 | 0.025 | 0.025 | 0.026 | 0.029 | 0.028 | 0.032 | 0.024 | 0.031 | 0.030 | 0.032 | 0.031 |
| Nb                                                                                | 0.001 | 0.001 | 0.003 | 0.001 | 0.001 | 0.001 | 0.001 | 0.003 | 0.001 | 0.002 | 0.000 | 0.002 | 0.002 | 0.004 | 0.002 | 0.000 | 0.002 | 0.001 |
| Cr                                                                                | 0.004 | 0.012 | 0.006 | 0.008 | 0.007 | 0.006 | 0.009 | 0.009 | 0.007 | 0.006 | 0.008 | 0.007 | 0.002 | 0.005 | 0.003 | 0.006 | 0.005 | 0.005 |
| Fe <sup>3+</sup>                                                                  | 0.412 | 0.673 | 0.403 | 0.838 | 0.923 | 1.027 | 1.003 | 0.727 | 0.949 | 0.597 | 0.755 | 0.554 | 0.424 | 0.478 | 0.356 | 0.777 | 0.711 | 0.642 |
| Fe <sup>2+</sup>                                                                  | 0.459 | 0.397 | 0.454 | 0.288 | 0.227 | 0.203 | 0.235 | 0.322 | 0.315 | 0.381 | 0.355 | 0.381 | 0.443 | 0.470 | 0.467 | 0.320 | 0.386 | 0.372 |
| Mn                                                                                | 0.010 | 0.014 | 0.004 | 0.012 | 0.003 | 0.004 | 0.004 | 0.012 | 0.005 | 0.009 | 0.006 | 0.000 | 0.000 | 0.004 | 0.002 | 0.002 | 0.003 | 0.002 |
| Sum B                                                                             | 2.969 | 3.019 | 2.964 | 2.967 | 2.970 | 2.983 | 3.001 | 2.953 | 2.991 | 2.967 | 2.991 | 2.964 | 2.971 | 2.983 | 2.964 | 2.993 | 3.003 | 2.992 |
| Ca                                                                                | 4.016 | 3.965 | 4.020 | 4.015 | 4.015 | 4.004 | 3.985 | 4.029 | 3.991 | 4.015 | 3.992 | 4.020 | 4.013 | 4.000 | 4.020 | 3.992 | 3.979 | 3.991 |
| Sr                                                                                | 0.012 | 0.014 | 0.012 | 0.015 | 0.010 | 0.011 | 0.011 | 0.014 | 0.014 | 0.014 | 0.015 | 0.012 | 0.011 | 0.014 | 0.012 | 0.012 | 0.014 | 0.013 |
| U                                                                                 | 0.002 | 0.002 | 0.004 | 0.003 | 0.005 | 0.002 | 0.003 | 0.003 | 0.003 | 0.004 | 0.003 | 0.004 | 0.005 | 0.002 | 0.004 | 0.002 | 0.003 | 0.004 |
| Sum A                                                                             | 4.031 | 3.981 | 4.036 | 4.033 | 4.030 | 4.017 | 3.999 | 4.047 | 4.009 | 4.033 | 4.009 | 4.036 | 4.029 | 4.017 | 4.036 | 4.007 | 3.996 | 4.008 |
| <i>End members (mole %)</i>                                                       |       |       |       |       |       |       |       |       |       |       |       |       |       |       |       |       |       |       |
| Ca <sub>4</sub> Ti <sub>2</sub> Fe <sup>3+</sup> Fe <sup>3+</sup> O <sub>11</sub> | 45.42 | 40.62 | 45.78 | 33.18 | 34.71 | 27.52 | 28.82 | 36.44 | 20.25 | 41.61 | 23.14 | 41.02 | 43.23 | 39.09 | 45.58 | 35.57 | 34.08 | 38.24 |
| Ca <sub>4</sub> Ti <sub>2</sub> Fe <sup>3+</sup> AlO <sub>11</sub>                | 13.52 | 12.91 | 15.51 | 16.22 | 21.50 | 24.85 | 23.05 | 14.79 | 19.18 | 14.68 | 26.87 | 20.43 | 21.02 | 15.22 | 18.47 | 20.77 | 18.02 | 21.51 |
| Ca <sub>4</sub> Ti <sub>2</sub> Fe <sup>2+</sup> SiO <sub>11</sub>                | 41.07 | 46.47 | 38.71 | 50.60 | 43.80 | 47.63 | 48.13 | 48.76 | 60.57 | 43.71 | 49.98 | 38.55 | 35.75 | 45.68 | 35.95 | 43.66 | 47.91 | 40.25 |

MgO, CuO, NiO and ZnO are below detection limits (<0.005 wt.%). Ntk – nataliakulite; Ntk-TEM – grain used for HRTEM study (see Figure 10); Ntk-1-2 – grains used for EBSD and Raman studies (see Figures 9 and 11); FeO and Fe<sub>2</sub>O<sub>3</sub> are calculated on charge balance.

Table S1. *Cont.*

| Area                                             | S-11  | S-11  | S-11  | S-11  | S-12  | S-12  | S-12  | S-12  | S-13a | S-13a | S-14a | S-14a | S-14a | S-14a | refl 4 | refl 4 | Ntk-TEM | Ntk-TEM | Ntk-TEM |
|--------------------------------------------------|-------|-------|-------|-------|-------|-------|-------|-------|-------|-------|-------|-------|-------|-------|--------|--------|---------|---------|---------|
| SiO <sub>2</sub>                                 | 4.99  | 4.60  | 5.99  | 5.47  | 4.44  | 4.07  | 4.69  | 4.24  | 3.71  | 4.63  | 6.09  | 4.06  | 5.05  | 5.60  | 5.63   | 5.93   | 4.38    | 5.84    | 5.11    |
| TiO <sub>2</sub>                                 | 27.61 | 31.20 | 28.00 | 26.66 | 30.47 | 31.00 | 29.27 | 31.13 | 32.64 | 28.45 | 29.34 | 31.85 | 29.86 | 27.79 | 26.37  | 26.01  | 30.33   | 28.69   | 29.51   |
| ZrO <sub>2</sub>                                 | 0.67  | 0.69  | 0.70  | 0.64  | 0.69  | 0.70  | 0.73  | 0.76  | 0.70  | 0.76  | 0.64  | 0.81  | 0.76  | 0.72  | 0.54   | 0.50   | 0.75    | 0.68    | 0.71    |
| Nb <sub>2</sub> O <sub>5</sub>                   | 0.01  | 0.04  | 0.04  | 0.05  | 0.01  | 0.07  | 0.06  | 0.03  | 0.08  | 0.04  | 0.05  | 0.05  | 0.10  | 0.00  | 0.04   | 0.04   | 0.00    | 0.06    | 0.03    |
| Cr <sub>2</sub> O <sub>3</sub>                   | 0.09  | 0.08  | 0.06  | 0.09  | 0.06  | 0.06  | 0.07  | 0.10  | 0.06  | 0.09  | 0.06  | 0.08  | 0.04  | 0.07  | 0.08   | 0.08   | 0.08    | 0.10    | 0.09    |
| Al <sub>2</sub> O <sub>3</sub>                   | 2.25  | 2.76  | 2.08  | 2.76  | 2.03  | 2.14  | 2.10  | 1.92  | 2.02  | 2.30  | 2.03  | 1.85  | 1.53  | 2.08  | 1.61   | 1.70   | 2.04    | 2.25    | 2.14    |
| Fe <sub>2</sub> O <sub>3</sub>                   | 17.02 | 10.67 | 14.35 | 17.62 | 13.26 | 12.42 | 14.48 | 11.85 | 9.93  | 16.15 | 11.44 | 10.79 | 12.92 | 15.56 | 18.60  | 18.69  | 13.31   | 13.04   | 13.17   |
| FeO                                              | 4.01  | 6.66  | 5.51  | 3.89  | 5.88  | 6.08  | 5.30  | 6.39  | 7.07  | 4.48  | 7.02  | 6.84  | 6.40  | 5.05  | 3.80   | 3.74   | 6.13    | 6.22    | 6.18    |
| MnO                                              | 0.04  | 0.03  | 0.05  | 0.06  | 0.03  | 0.02  | 0.00  | 0.02  | 0.00  | 0.00  | 0.06  | 0.00  | 0.07  | 0.07  | 0.21   | 0.25   | 0.00    | 0.07    | 0.04    |
| CaO                                              | 42.17 | 42.50 | 42.35 | 42.23 | 42.28 | 42.07 | 42.13 | 42.07 | 42.08 | 42.20 | 42.18 | 42.06 | 41.91 | 42.10 | 41.82  | 41.91  | 41.90   | 42.12   | 42.01   |
| SrO                                              | 0.24  | 0.22  | 0.26  | 0.28  | 0.23  | 0.28  | 0.27  | 0.22  | 0.27  | 0.24  | 0.23  | 0.25  | 0.30  | 0.27  | 0.32   | 0.32   | 0.23    | 0.25    | 0.24    |
| UO <sub>2</sub>                                  | 0.14  | 0.24  | 0.14  | 0.19  | 0.19  | 0.19  | 0.20  | 0.19  | 0.21  | 0.20  | 0.13  | 0.17  | 0.07  | 0.17  | 0.28   | 0.28   | 0.19    | 0.08    | 0.13    |
| Sum                                              | 99.23 | 99.69 | 99.52 | 99.94 | 99.58 | 99.08 | 99.29 | 98.91 | 98.79 | 99.54 | 99.26 | 98.81 | 99.01 | 99.48 | 99.30  | 99.44  | 99.33   | 99.39   | 99.36   |
| <i>Formula based on 8 cations and 11 oxygens</i> |       |       |       |       |       |       |       |       |       |       |       |       |       |       |        |        |         |         |         |
| Si                                               | 0.442 | 0.404 | 0.527 | 0.480 | 0.392 | 0.362 | 0.416 | 0.377 | 0.331 | 0.409 | 0.537 | 0.362 | 0.449 | 0.494 | 0.500  | 0.525  | 0.388   | 0.514   | 0.451   |
| Al                                               | 0.235 | 0.286 | 0.215 | 0.286 | 0.212 | 0.224 | 0.219 | 0.202 | 0.212 | 0.240 | 0.211 | 0.194 | 0.161 | 0.216 | 0.168  | 0.177  | 0.213   | 0.233   | 0.223   |
| Fe <sup>3+</sup>                                 | 0.323 | 0.310 | 0.257 | 0.234 | 0.396 | 0.415 | 0.366 | 0.421 | 0.457 | 0.351 | 0.253 | 0.444 | 0.390 | 0.289 | 0.332  | 0.298  | 0.398   | 0.253   | 0.325   |
| Sum T                                            | 1.000 | 1.000 | 1.000 | 1.000 | 1.000 | 1.000 | 1.000 | 1.000 | 1.000 | 1.000 | 1.000 | 1.000 | 1.000 | 1.000 | 1.000  | 1.000  | 1.000   | 1.000   | 1.000   |
| Ti                                               | 1.838 | 2.061 | 1.853 | 1.759 | 2.025 | 2.071 | 1.951 | 2.083 | 2.188 | 1.891 | 1.944 | 2.135 | 1.997 | 1.844 | 1.761  | 1.732  | 2.022   | 1.900   | 1.961   |
| Zr                                               | 0.029 | 0.030 | 0.030 | 0.027 | 0.030 | 0.030 | 0.032 | 0.033 | 0.030 | 0.033 | 0.028 | 0.035 | 0.033 | 0.031 | 0.023  | 0.022  | 0.032   | 0.029   | 0.031   |
| Nb                                               | 0.000 | 0.002 | 0.001 | 0.002 | 0.000 | 0.003 | 0.002 | 0.001 | 0.003 | 0.002 | 0.002 | 0.002 | 0.004 | 0.000 | 0.002  | 0.002  | 0.000   | 0.003   | 0.001   |
| Cr                                               | 0.006 | 0.005 | 0.004 | 0.006 | 0.004 | 0.004 | 0.005 | 0.007 | 0.004 | 0.006 | 0.004 | 0.006 | 0.003 | 0.005 | 0.006  | 0.006  | 0.005   | 0.007   | 0.006   |
| Fe <sup>3+</sup>                                 | 0.811 | 0.395 | 0.693 | 0.929 | 0.486 | 0.416 | 0.600 | 0.373 | 0.209 | 0.724 | 0.506 | 0.280 | 0.474 | 0.744 | 0.911  | 0.947  | 0.489   | 0.611   | 0.551   |
| Fe <sup>2+</sup>                                 | 0.297 | 0.489 | 0.405 | 0.285 | 0.435 | 0.452 | 0.393 | 0.476 | 0.527 | 0.331 | 0.517 | 0.510 | 0.476 | 0.373 | 0.282  | 0.277  | 0.455   | 0.458   | 0.456   |
| Mn                                               | 0.003 | 0.002 | 0.004 | 0.005 | 0.002 | 0.001 | 0.000 | 0.001 | 0.000 | 0.000 | 0.004 | 0.000 | 0.005 | 0.005 | 0.016  | 0.019  | 0.000   | 0.005   | 0.003   |
| Sum B                                            | 2.985 | 2.984 | 2.991 | 3.013 | 2.982 | 2.977 | 2.982 | 2.974 | 2.963 | 2.987 | 3.005 | 2.967 | 2.991 | 3.002 | 3.000  | 3.003  | 3.004   | 3.013   | 3.009   |
| Ca                                               | 4.001 | 4.000 | 3.993 | 3.969 | 4.003 | 4.005 | 4.000 | 4.012 | 4.019 | 3.997 | 3.981 | 4.017 | 3.992 | 3.981 | 3.978  | 3.975  | 3.980   | 3.973   | 3.977   |
| Sr                                               | 0.012 | 0.011 | 0.013 | 0.014 | 0.012 | 0.014 | 0.014 | 0.011 | 0.014 | 0.012 | 0.011 | 0.013 | 0.015 | 0.014 | 0.016  | 0.016  | 0.012   | 0.013   | 0.012   |
| U                                                | 0.003 | 0.005 | 0.003 | 0.004 | 0.004 | 0.004 | 0.004 | 0.004 | 0.004 | 0.004 | 0.002 | 0.003 | 0.001 | 0.003 | 0.006  | 0.006  | 0.004   | 0.001   | 0.003   |
| Sum A                                            | 4.015 | 4.016 | 4.009 | 3.987 | 4.018 | 4.023 | 4.018 | 4.026 | 4.037 | 4.013 | 3.995 | 4.033 | 4.009 | 3.998 | 4.000  | 3.997  | 3.996   | 3.987   | 3.991   |

| <i>End members (mole %)</i>                                                       |       |       |       |       |       |       |       |       |       |       |       |       |       |       |       |       |       |       |       |
|-----------------------------------------------------------------------------------|-------|-------|-------|-------|-------|-------|-------|-------|-------|-------|-------|-------|-------|-------|-------|-------|-------|-------|-------|
| Ca <sub>4</sub> Ti <sub>2</sub> Fe <sup>3+</sup> Fe <sup>3+</sup> O <sub>11</sub> | 32.35 | 31.04 | 25.74 | 23.44 | 39.60 | 41.47 | 36.56 | 42.10 | 45.70 | 35.10 | 25.27 | 44.40 | 39.03 | 28.94 | 33.17 | 29.77 | 39.85 | 25.27 | 32.53 |
| Ca <sub>4</sub> Ti <sub>2</sub> Fe <sup>3+</sup> AlO <sub>11</sub>                | 23.47 | 28.55 | 21.54 | 28.58 | 21.17 | 22.37 | 21.88 | 20.17 | 21.23 | 23.97 | 21.08 | 19.41 | 16.07 | 21.63 | 16.85 | 17.74 | 21.32 | 23.32 | 22.32 |
| Ca <sub>4</sub> Ti <sub>2</sub> Fe <sup>2+</sup> SiO <sub>11</sub>                | 44.18 | 40.41 | 52.72 | 47.99 | 39.23 | 36.16 | 41.56 | 37.73 | 33.07 | 40.93 | 53.65 | 36.19 | 44.90 | 49.42 | 49.98 | 52.50 | 38.84 | 51.42 | 45.15 |

MgO, CuO, NiO and ZnO are below detection limits (<0.005 wt.%). Ntk – nataliakulite; Ntk-TEM – grain used for HRTEM study (see Figure 10); Ntk-1-2 – grains used for EBSD and Raman studies (see Figures 9 and 11); FeO and Fe<sub>2</sub>O<sub>3</sub> are calculated on charge balance.

**Table S1. Cont.**

| Area                                             | Ntk-1 | Ntk-2 | Ntk-2 | Ntk-2 | Ntk-2 | Ntk-2  | Ntk-2 | Ntk-2 |
|--------------------------------------------------|-------|-------|-------|-------|-------|-------|-------|-------|-------|-------|-------|--------|-------|-------|
|                                                  | n=5   |       |       |       |       |       | n=6   |       |       |       |       |        |       |       |
| SiO <sub>2</sub>                                 | 4.92  | 5.54  | 5.24  | 4.90  | 4.96  | 5.11  | 5.11  | 5.26  | 5.28  | 5.31  | 4.66  | 5.37   | 5.17  |       |
| TiO <sub>2</sub>                                 | 30.33 | 29.02 | 29.02 | 30.03 | 30.03 | 29.69 | 28.64 | 29.29 | 29.04 | 28.39 | 32.13 | 29.17  | 29.44 |       |
| ZrO <sub>2</sub>                                 | 0.66  | 0.77  | 0.80  | 0.76  | 0.74  | 0.75  | 0.65  | 0.74  | 0.59  | 0.53  | 0.84  | 0.77   | 0.69  |       |
| Nb <sub>2</sub> O <sub>5</sub>                   | 0.04  | 0.04  | 0.04  | 0.04  | 0.04  | 0.04  | 0.04  | 0.04  | 0.04  | 0.04  | 0.04  | 0.04   | 0.04  |       |
| Cr <sub>2</sub> O <sub>3</sub>                   | 0.08  | 0.08  | 0.08  | 0.08  | 0.08  | 0.08  | 0.08  | 0.08  | 0.08  | 0.08  | 0.08  | 0.08   | 0.08  |       |
| Al <sub>2</sub> O <sub>3</sub>                   | 2.17  | 2.29  | 2.63  | 2.55  | 2.23  | 2.37  | 2.31  | 2.44  | 2.40  | 3.02  | 1.91  | 2.72   | 2.47  |       |
| Fe <sub>2</sub> O <sub>3</sub>                   | 12.19 | 12.98 | 13.03 | 12.37 | 12.23 | 12.56 | 14.08 | 12.68 | 13.29 | 14.17 | 9.24  | 13.08  | 12.76 |       |
| FeO                                              | 6.71  | 6.02  | 5.79  | 6.31  | 6.60  | 6.29  | 5.10  | 6.03  | 5.94  | 4.99  | 8.07  | 5.91   | 6.01  |       |
| MnO                                              | 0.05  | 0.05  | 0.05  | 0.05  | 0.05  | 0.05  | 0.14  | 0.14  | 0.14  | 0.14  | 0.14  | 0.14   | 0.14  |       |
| CaO                                              | 42.01 | 42.29 | 42.15 | 42.19 | 41.91 | 42.11 | 41.99 | 42.06 | 41.87 | 42.31 | 41.91 | 42.37  | 42.09 |       |
| SrO                                              | 0.30  | 0.30  | 0.32  | 0.30  | 0.31  | 0.31  | 0.32  | 0.30  | 0.32  | 0.31  | 0.34  | 0.33   | 0.32  |       |
| UO <sub>2</sub>                                  | 0.28  | 0.28  | 0.27  | 0.24  | 0.33  | 0.28  | 0.28  | 0.28  | 0.28  | 0.32  | 0.28  | 0.24   | 0.28  |       |
| Sum                                              | 99.74 | 99.66 | 99.43 | 99.82 | 99.51 | 99.63 | 98.74 | 99.34 | 99.27 | 99.61 | 99.64 | 100.22 | 99.47 |       |
| <i>Formula based on 8 cations and 11 oxygens</i> |       |       |       |       |       |       |       |       |       |       |       |        |       |       |
| Si                                               | 0.434 | 0.488 | 0.462 | 0.431 | 0.438 | 0.450 | 0.454 | 0.464 | 0.467 | 0.466 | 0.412 | 0.469  | 0.456 |       |
| Al                                               | 0.225 | 0.238 | 0.273 | 0.264 | 0.232 | 0.247 | 0.242 | 0.254 | 0.250 | 0.313 | 0.199 | 0.280  | 0.256 |       |
| Fe <sup>3+</sup>                                 | 0.341 | 0.275 | 0.265 | 0.305 | 0.330 | 0.303 | 0.304 | 0.282 | 0.283 | 0.221 | 0.389 | 0.250  | 0.288 |       |
| Sum T                                            | 1.000 | 1.000 | 1.000 | 1.000 | 1.000 | 1.000 | 1.000 | 1.000 | 1.000 | 1.000 | 1.000 | 1.000  | 1.000 |       |
| Ti                                               | 2.010 | 1.920 | 1.924 | 1.985 | 1.995 | 1.967 | 1.915 | 1.945 | 1.930 | 1.875 | 2.135 | 1.918  | 1.953 |       |
| Zr                                               | 0.028 | 0.033 | 0.034 | 0.033 | 0.032 | 0.032 | 0.028 | 0.032 | 0.025 | 0.023 | 0.036 | 0.033  | 0.030 |       |
| Nb                                               | 0.002 | 0.002 | 0.002 | 0.002 | 0.002 | 0.002 | 0.002 | 0.002 | 0.002 | 0.002 | 0.002 | 0.002  | 0.002 |       |
| Cr                                               | 0.006 | 0.006 | 0.006 | 0.006 | 0.006 | 0.006 | 0.006 | 0.006 | 0.006 | 0.006 | 0.006 | 0.006  | 0.006 |       |
| Fe <sup>3+</sup>                                 | 0.468 | 0.584 | 0.600 | 0.514 | 0.484 | 0.530 | 0.638 | 0.561 | 0.601 | 0.716 | 0.225 | 0.610  | 0.559 |       |
| Fe <sup>2+</sup>                                 | 0.495 | 0.443 | 0.427 | 0.464 | 0.488 | 0.463 | 0.379 | 0.445 | 0.439 | 0.366 | 0.596 | 0.432  | 0.443 |       |
| Mn                                               | 0.004 | 0.004 | 0.004 | 0.004 | 0.004 | 0.004 | 0.011 | 0.010 | 0.010 | 0.010 | 0.010 | 0.010  | 0.010 |       |

|                                                                                   |       |       |       |       |       |       |       |       |       |       |       |       |       |
|-----------------------------------------------------------------------------------|-------|-------|-------|-------|-------|-------|-------|-------|-------|-------|-------|-------|-------|
| Sum B                                                                             | 3.012 | 2.992 | 2.997 | 3.006 | 3.010 | 3.003 | 2.978 | 3.000 | 3.013 | 2.997 | 3.010 | 3.010 | 3.001 |
| Ca                                                                                | 3.967 | 3.987 | 3.982 | 3.974 | 3.968 | 3.976 | 4.000 | 3.979 | 3.965 | 3.981 | 3.967 | 3.968 | 3.977 |
| Sr                                                                                | 0.015 | 0.015 | 0.016 | 0.015 | 0.016 | 0.016 | 0.016 | 0.015 | 0.016 | 0.016 | 0.017 | 0.017 | 0.016 |
| U                                                                                 | 0.005 | 0.005 | 0.005 | 0.005 | 0.006 | 0.005 | 0.006 | 0.006 | 0.006 | 0.006 | 0.006 | 0.005 | 0.005 |
| Sum A                                                                             | 3.988 | 4.008 | 4.003 | 3.994 | 3.990 | 3.997 | 4.022 | 4.000 | 3.987 | 4.003 | 3.990 | 3.990 | 3.999 |
| <i>End members (mole %)</i>                                                       |       |       |       |       |       |       |       |       |       |       |       |       |       |
| Ca <sub>4</sub> Ti <sub>2</sub> Fe <sup>3+</sup> Fe <sup>3+</sup> O <sub>11</sub> | 34.09 | 27.50 | 26.47 | 30.50 | 32.95 | 30.30 | 30.37 | 28.17 | 28.33 | 22.11 | 38.94 | 25.03 | 28.81 |
| Ca <sub>4</sub> Ti <sub>2</sub> Fe <sup>3+</sup> AlO <sub>11</sub>                | 22.54 | 23.75 | 27.33 | 26.42 | 23.22 | 24.65 | 24.20 | 25.39 | 25.00 | 31.26 | 19.89 | 28.02 | 25.64 |
| Ca <sub>4</sub> Ti <sub>2</sub> Fe <sup>2+</sup> SiO <sub>11</sub>                | 43.36 | 48.75 | 46.20 | 43.08 | 43.83 | 45.04 | 45.43 | 46.44 | 46.67 | 46.63 | 41.17 | 46.94 | 45.55 |

MgO, CuO, NiO and ZnO are below detection limits (<0.005 wt.%). Ntk – nataliakulite; Ntk-TEM – grain used for HRTEM study (see Figure 10); Ntk-1-2 – grains used for EBSD and Raman studies (see Figures 9 and 11); FeO and Fe<sub>2</sub>O<sub>3</sub> are calculated on charge balance.

**Table S2.** Chemical composition (WDS-EDS, wt.%) of Fe<sup>3+</sup>-rich perovskite from larnite-gehlenite rocks (W11-3, W11-2-2), Nahal Morag Canyon, Hatrurim Basin, Israel.

| Sample                            | W11-3  |       |       |       |        |        | W11-2-2 |       |       |       |
|-----------------------------------|--------|-------|-------|-------|--------|--------|---------|-------|-------|-------|
| Area                              | S-8a   | S-9a  | S-12  | S-13a | S-14a  | Refl-2 | n=6     | s2    | s2    | n=2   |
| SiO <sub>2</sub>                  | 3.13   | 3.70  | 3.61  | 3.71  | 4.04   | 4.66   | 3.81    | 2.85  | 3.02  | 2.94  |
| TiO <sub>2</sub>                  | 34.98  | 33.69 | 33.60 | 32.64 | 33.10  | 32.13  | 33.36   | 38.70 | 38.53 | 38.62 |
| ZrO <sub>2</sub>                  | 0.79   | 0.77  | 0.73  | 0.70  | 0.61   | 0.84   | 0.74    | 0.46  | 0.36  | 0.41  |
| Nb <sub>2</sub> O <sub>5</sub>    | 0.12   | 0.04  | 0.04  | 0.08  | 0.02   | 0.04   | 0.06    | 0.00  | 0.00  | 0.00  |
| Cr <sub>2</sub> O <sub>3</sub>    | 0.03   | 0.07  | 0.11  | 0.06  | 0.05   | 0.08   | 0.07    | 0.19  | 0.26  | 0.23  |
| Al <sub>2</sub> O <sub>3</sub>    | 1.51   | 1.62  | 2.10  | 2.02  | 1.64   | 1.91   | 1.80    | 1.28  | 1.27  | 1.28  |
| Fe <sub>2</sub> O <sub>3</sub>    | 17.58  | 17.51 | 16.85 | 17.79 | 18.04  | 18.20  | 17.66   | 13.87 | 14.13 | 14.00 |
| MnO                               | 0.00   | 0.00  | 0.00  | 0.00  | 0.02   | 0.14   | 0.03    | 0.14  | 0.14  | 0.14  |
| MgO                               | 0.00   | 0.00  | 0.00  | 0.00  | 0.00   | 0.00   | 0.00    | 0.00  | 0.00  | 0.00  |
| CaO                               | 41.91  | 41.96 | 41.94 | 42.08 | 42.07  | 41.91  | 41.98   | 41.38 | 41.17 | 41.28 |
| SrO                               | 0.24   | 0.21  | 0.26  | 0.27  | 0.27   | 0.34   | 0.27    | 0.20  | 0.20  | 0.20  |
| UO <sub>2</sub>                   | 0.23   | 0.22  | 0.22  | 0.21  | 0.21   | 0.28   | 0.23    | 0.00  | 0.00  | 0.00  |
| Sum                               | 100.52 | 99.79 | 99.46 | 99.58 | 100.07 | 100.53 | 99.99   | 99.07 | 99.08 | 99.07 |
| <i>Formula based on 2 cations</i> |        |       |       |       |        |        |         |       |       |       |
| Si                                | 0.070  | 0.082 | 0.081 | 0.083 | 0.090  | 0.103  | 0.085   | 0.064 | 0.068 | 0.066 |
| Al                                | 0.039  | 0.043 | 0.055 | 0.053 | 0.043  | 0.050  | 0.047   | 0.034 | 0.034 | 0.034 |
| Ti                                | 0.585  | 0.565 | 0.564 | 0.547 | 0.553  | 0.534  | 0.558   | 0.655 | 0.652 | 0.654 |
| Zr                                | 0.009  | 0.008 | 0.008 | 0.008 | 0.007  | 0.009  | 0.008   | 0.005 | 0.004 | 0.005 |
| Nb                                | 0.001  | 0.000 | 0.000 | 0.001 | 0.000  | 0.000  | 0.001   | 0.000 | 0.000 | 0.000 |
| Cr                                | 0.000  | 0.001 | 0.002 | 0.001 | 0.001  | 0.001  | 0.001   | 0.003 | 0.005 | 0.004 |
| Fe <sup>3+</sup>                  | 0.294  | 0.294 | 0.283 | 0.298 | 0.301  | 0.303  | 0.296   | 0.235 | 0.239 | 0.237 |
| Mn                                | 0.000  | 0.000 | 0.000 | 0.000 | 0.000  | 0.003  | 0.000   | 0.003 | 0.003 | 0.003 |
| Mg                                | 0.000  | 0.000 | 0.000 | 0.000 | 0.000  | 0.000  | 0.000   | 0.000 | 0.000 | 0.000 |
| Ca                                | 0.998  | 1.002 | 1.003 | 1.005 | 1.001  | 0.992  | 1.000   | 0.998 | 0.993 | 0.996 |
| Sr                                | 0.003  | 0.003 | 0.003 | 0.004 | 0.003  | 0.004  | 0.003   | 0.003 | 0.003 | 0.003 |
| U                                 | 0.001  | 0.001 | 0.001 | 0.001 | 0.001  | 0.001  | 0.001   | 0.000 | 0.000 | 0.000 |
| CaFeO <sub>2.5</sub>              | 0.40   | 0.42  | 0.42  | 0.44  | 0.44   | 0.46   | 0.43    | 0.34  | 0.34  | 0.34  |

The molar fraction of CaFeO<sub>2.5</sub> was calculated as (Fe<sup>3+</sup> + Al + Cr + Si)/(Fe<sup>3+</sup> + Al + Cr + Ti + Si + Zr + Nb). Photo of Fe<sup>3+</sup>-rich perovskite from sample W11-2-2 is given in Figure 13 of the manuscript.
